# Supplementary material for: Widespread pain in axial spondyloarthritis: clinical importance and gender differences
Source: Arthritis Res Ther. 2018 Jul 27;20:156. doi: 10.1186/s13075-018-1626-8 (PMC6062924; doi:10.1186/s13075-018-1626-8)
Supplement: Supplementary file 1 — Table S1. Inter-rater reliability for each body chart region for the topographical pain assessment in patients with axial spondyloarthritis (n = 170). Reliability data for each body chart location. (XLSX 18 kb) [file 13075_2018_1626_MOESM1_ESM.xlsx]

## Sheet: eTable1 kappa
	eTable 1: Inter-rater reliability for each body chart location for the topographical pain assessment in patient with axial spondyloarthritis (n=170)
	Pain region		Kappa		SE		95% CI				p-value*		A cell frequency		D cell frequency		% of agreement
							LOWER		UPPER
	LOC 1		0.933		0.047		0.84088		1		0		119		16		98.5401
	LOC 2		0.953		0.047		0.86088		1		0		125		11		99.2701
	LOC 3		1		0		1		1		0		127		10		100
	LOC 4		0.937		0.062		0.81548		1		0		128		8		99.2701
	LOC 5		1		0		1		1		0		129		8		100
	LOC 6		0.849		0.105		0.6432		1		0		129		6		98.5401
	LOC 7		0.979		0.021		0.93784		1		0		106		30		99.2701
	LOC 8		0.973		0.026		0.92204		1		0		114		22		99.2701
	LOC 9		0.966		0.034		0.89936		1		0		120		16		99.2701
	LOC 10		1		0		1		1		0		128		9		100
	LOC 11		1		0		1		1		0		115		22		100
	LOC 12		1		0		1		1		0		117		20		100
	LOC 13		1		0		1		1		0		127		10		100
	LOC 14		0.953		0.047		0.86088		1		0		125		11		99.2701
	LOC 15		0.896		0.051		0.79604		0.99596		0		112		21		97.0803
	LOC 16		0.883		0.051		0.78304		0.98296		0		108		24		96.3504
	LOC 17		0.976		0.024		0.92896		1		0		111		25		99.2701
	LOC 18		0.953		0.033		0.88832		1		0		110		25		98.5401
	LOC 19		1		0		1		1		0		116		21		100
	LOC 20		0.902		0.048		0.80792		0.99608		0		110		23		97.0803
	LOC 21		1		0		1		1		0		136		1		100
	LOC 22		1		0		1		1		0		136		1		100
	LOC 23		1		0		1		1		0		132		5		100
	LOC 24		1		0		1		1		0		131		6		100
	LOC 25		1		0		1		1		0		114		23		100
	LOC 26		0.973		0.026		0.92204		1		0		114		22		99.2701
	LOC 27		1		0		1		1		0		134		3		100
	LOC 28		1		0		1		1		0		134		3		100
	LOC 29		1		0		1		1		0		131		6		100
	LOC 30		1		0		1		1		0		131		6		100
	LOC 31		1		0		1		1		0		137		0		100	*
	LOC 32		1		0		1		1		0		134		3		100
	LOC 33		0.881		0.083		0.71832		1		0		127		8		98.5401
	LOC 34		0.784		0.104		0.58016		0.98784		0		125		8		97.0803
	LOC 35		0.914		0.049		0.81796		1		0		115		19		97.8102
	LOC 36		0.844		0.068		0.71072		0.97728		0		116		16		96.3504
	LOC 37		0.789		0.118		0.55772		1		0		128		6		97.8102
	LOC 38		0.915		0.06		0.7974		1		0		123		12		98.5401
	LOC 39		0.745		0.099		0.55096		0.93904		0		121		10		95.6204
	LOC 40		0.891		0.062		0.76948		1		0		120		14		97.8102
	LOC 41		1		0		1		1		0		135		2		100
	LOC 42		0.853		0.144		0.57076		1		0		133		3		99.2701
	LOC 43		0.892		0.075		0.745		1		0		126		9		98.5401
	LOC 44		0.892		0.075		0.745		1		0		126		9		98.5401
	LOC 45		1		0		1		1		0		130		7		100
	LOC 46		0.919		0.08		0.7622		1		0		130		6		99.2701
	LOC 47		0.956		0.025		0.907		1		0		72		62		97.8102
	LOC 48		0.97		0.021		0.92884		1		0		77		58		98.5401
	LOC 49		0.923		0.038		0.84852		0.99748		0		100		33		97.0803
	LOC 50		0.937		0.036		0.86644		1		0		105		29		97.8102
	LOC 51		0.926		0.033		0.86132		0.99068		0		75		57		96.3504
	LOC 52		0.941		0.029		0.88416		0.99784		0		73		60		97.0803
	LOC 53		0.958		0.0296		0.899984		1		0		105		30		98.5401
	LOC 54		0.958		0.029		0.90116		1		0		105		30		98.5401
	LOC 55		0.956		0.025		0.907		1		0		62		72		97.8102
	LOC 56		0.985		0.015		0.9556		1		0		62		74		99.2701
	LOC 57		0.939		0.043		0.85472		1		0		117		18		98.5401
	LOC 58		0.929		0.05		0.831		1		0		120		15		98.5401
	LOC 59		0.982		0.018		0.94672		1		0		97		39		99.2701
	LOC 60		0.946		0.031		0.88524		1		0		97		37		97.8102
	LOC 61		0.906		0.038		0.83152		0.98048		0		84		47		95.6204
	LOC 62		0.917		0.036		0.84644		0.98756		0		90		42		96.3504
	LOC 63		0.94		0.029		0.88316		0.99684		0		77		56		97.0803
	LOC 64		0.881		0.041		0.80064		0.96136		0		74		55		94.1606
	LOC 65		0.942		0.029		0.88516		0.99884		0		69		64		97.0803
	LOC 66		0.956		0.025		0.907		1		0		72		62		97.8102
	LOC 67		0.867		0.093		0.68472		1		0		128		7		98.5401
	LOC 68		0.812		0.106		0.60424		1		0		127		7		97.8102
	LOC 69		0.954		0.032		0.89128		1		0		109		26		98.5401
	LOC 70		0.886		0.05		0.788		0.984		0		107		25		96.3504
	LOC 71		1		0		1		1		0		133		4		100
	LOC 72		0.853		0.144		0.57076		1		0		133		3		99.2701
	LOC 73		0.943		0.056		0.83324		1		0		127		9		99.2701
	LOC 74		1		0		1		1		0		129		8		100
	LOC 75		0.85		0.104		0.64616		1		0		129		6		98.5401
	LOC 76		0.742		0.175		0.399		1		0		132		3		98.5401
	LOC 77		0.943		0.056		0.83324		1		0		127		9		99.2701
	LOC 78		0.948		0.051		0.84804		1		0		126		10		99.2701
	LOC 79		0.929		0.05		0.831		1		0		120		15		98.5401
	LOC 80		0.897		0.059		0.78136		1		0		119		15		97.8102
	Legend: LOC, body chart region 1-80; SE, standard error; 95% CI, 95% confidence interval presented as lower and upper bound; *p-value, level of significance set at p<.05; A cell frequency, number of corresponding 0 values in cell A of the 2x2 contingency table; D cell frequency, number of correponding 1 values in cell D of the 2X2 contingency table
