# Supplementary material for: Widespread pain in axial spondyloarthritis: clinical importance and gender differences
Source: Arthritis Res Ther. 2018 Jul 27;20:156. doi: 10.1186/s13075-018-1626-8 (PMC6062924; doi:10.1186/s13075-018-1626-8)
Supplement: Supplementary file 2 — Table S2. Painful body locations expressed as prevalence estimates for the total group and by gender in patients with axial spondyloarthritis (n = 170). Detailed analysis of prevalence outcomes per body location and per gender. (XLSX 19 kb) [file 13075_2018_1626_MOESM2_ESM.xlsx]

## Sheet: eTable2 location details
	eTable 2: Painful body locations expressed as prevalence estimates for the total group and by gender in patients with axial spondyloarthritis (n=170)
	Pain location	Total group	Men (n=108)	Women (n=62)	Chi-value	DF	p-value	Phi-value	p-value	Odds ratio£	p-value
	1	11.2 (10.8-11.6)	9.3 (9.0-9.6)	14.5 (14.1-14.9)	1.096	1	0.295	0.080	0.295	2.01 (0.68-5.94)	0.208194
	2	8.8 (8.5-9.1)	5.6 (5.3-5.9)	14.5 (14.1-14.9)	3.931	1	0.047	0.152	0.047	3.34 (0.92-12.17)	0.0670568
	3	7.6 (7.3-7.9)	5.6 (5.3-5.9)	11.3 (10.9-11.7)	1.834	1	0.231*	0.104	0.176	2.37 (0.70-8.08)	0.166754
	4	7.6 (7.3-7.9)	6.5 (6.2-6.8)	9.7 (9.4-10.0)	0.570	1	0.551*	0.058	0.450	2.21 (0.58-8.39)	0.244988
	5	5.3 (5-5.6)	4.6 (4.4-4.8)	6.5 (6.2-6.8)	0.261	1	0.725*	0.039	0.610	1.05 (0.20-5.45)	0.956206
	6	3.5 (3.3-3.7)	3.7 (3.5-3.9)	3.2 (3-3.4)	0.026	1	0.568*	-0.012	0.871	1.04 (0.17-6.33)	0.969199
	7	21.8 (21.3-22.3)	20.4 (19.9-20.9)	24.2 (23.7-24.7)	0.338	1	0.561	0.045	0.561	1.32 (0.57-3.06)	0.520648
	8	15.9 (15.5-16.3)	14.8 (14.4-15.2)	17.7 (17.3-18.1)	0.253	1	0.615	0.039	0.615	1.59 (0.63-4.01)	0.321155
	9	12.4 (12-12.8)	12 (11.6-12.4)	12.9 (12.5-13.3)	0.027	1	0.869	0.013	0.869	1.09 (0.36-3.33)	0.879227
	10	9.4 (9.1-9.7)	9.3 (9-9.6)	9.7 (9.4-10.0)	0.008	1	0.928	0.007	0.928	1.12 (0.34-3.75)	0.85176
	11	15.3 (14.9-15.7)	13 (12.6-13.4)	19.4 (18.9-19.9)	1.242	1	0.265	0.085	0.265	1.51 (0.57-4.02)	0.405372
	12	15.3 (14.9-15.7)	15.7 (15.3-16.1)	14.5 (14.1-14.9)	0.046	1	0.831	-0.016	0.831	1.51 (0.54-4.25)	0.432475
	13	8.2 (7.9-8.5)	5.6 (5.3-5.9)	12.9 (12.5-13.3)	2.814	1	0.093	0.129	0.093	2.86 (0.73-11.26)	0.132087
	14	9.4 (9.1-9.7)	6.5 (6.2-6.8)	14.5 (14.1-14.9)	2.982	1	0.084	0.132	0.084	1.99 (0.58-6.91)	0.276125
	15	17.6 (17.2-18)	13 (12.6-13.4)	25.8 (25.3-26.3)	4.471	1	0.034	0.162	0.034	3.21 (1.22-8.47)	0.0184674
	16	19.4 (18.9-19.9)	14.8 (14.4-15.2)	27.4 (26.9-27.9)	4.000	1	0.045	0.153	0.045	2.04 (0.80-5.20)	0.135257
	17	20 (19.5-20.5)	18.5 (18.1-18.9)	22.6 (22.1-23.1)	0.406	1	0.524	0.049	0.524	0.98 (0.39-2.48)	0.971821
	18	20 (19.5-20.5)	18.5 (18.1-18.9)	22.6 (22.1-23.1)	0.406	1	0.524	0.049	0.524	0.86 (0.33-2.24)	0.760285
	19	12.4 (12-12.8)	9.3 (9-9.6)	17.7 (17.3-18.1)	2.618	1	0.106	0.124	0.106	3.23 (1.08-9.64)	0.0352228
	20	14.7 (14.3-15.1)	11.1 (10.7-11.5)	21.0 (20.5-21.5)	3.051	1	0.081	0.134	0.081	3.27 (1.11-9.62)	0.0309497
	21	0.6 (0.5-0.7)	0.9 (0.8-1.0)	0.0 (0.0-0.0)	0.577	1	>.999*	-0.058	0.447	0.00 (0.00-0.00)	1
	22	0.6 (0.5-0.7)	0.0 (0.0-0.0)	1.6 (1.5-1.7)	1.752	1	0.365*	0.102	0.186	0.00 (0.00-0.00)	0.994025
	23	4.1 (3.9-4.3)	3.7 (3.5-3.9)	4.8 (4.6-5)	0.129	1	0.707*	0.027	0.720	0.86 (0.14-5.23)	0.867501
	24	4.7 (4.5-4.9)	1.9 (1.7-2.1)	9.7 (9.4-10)	5.379	1	0.052*	0.178	0.020	5.05 (0.87-29.27)	0.0709979
	25	13.5 (13.1-13.9)	11.1 (10.7-11.5)	17.7 (17.3-18.1)	1.48	1	0.224	0.093	0.224	2.21 (0.73-6.70)	0.161196
	26	15.3 (14.9-15.7)	16.5 (16.1-16.9)	16.1 (15.7-16.5)	0.053	1	0.819	0.018	0.819	1.06 (0.37-3.00)	0.913376
	27	1.2 (1.1-1.3)	1.9 (1.7-2.1)	1 (0.9-1.1)	1.162	1	0.534*	-0.083	0.281	0.00 (0.00-0.00)	0.997082
	28	1.8 (1.6-2)	2.8 (2.6-3)	0.0 (0.0-0.0)	1.753	1	0.301*	-0.102	0.185	0.00 (0.00-0.00)	0.997087
	29	4.7 (4.5-4.9)	5.6 (5.3-5.9)	3.2 (3-3.4)	0.477	1	0.712*	-0.053	0.490	0.64 (0.11-3.75)	0.621277
	30	4.1 (3.9-4.3)	4.6 (4.4-4.8)	3.2 (3-3.4)	0.197	1	>.999*	-0.034	0.657	0.65 (0.11-3.71)	0.623143
	31	1.2 (1.1-1.3)	1.9 (1.7-2.1)	0.0 (0.0-0.0)	1.162	1	0.534*	-0.083	0.281	0.00 (0.00-0.00)	0.989072
	32	1.8 (1.6-2)	2.8 (2.6-3)	0.0 (0.0-0.0)	1.753	1	0.301*	-0.102	0.185	0.00 (0.00-0.00)	0.996697
	33	5.3 (5-5.6)	5.6 (5.3-5.9)	4.8 (4.6-5)	0.04	1	>.999*	-0.015	0.841	1.42 (0.28-7.30)	0.671738
	34	5.3 (5-5.6)	3.7 (3.5-3.9)	8.1 (7.8-8.4)	1.494	1	0.289	0.094	0.222	4.98 (0.84-29.56)	0.0771986
	35	12.4 (12-12.8)	10.2 (9.9-10.5)	16.1 (15.7-16.5)	1.285	1	0.257	0.087	0.257	1.64 (0.54-5.05)	0.384774
	36	9.4 (9.1-9.7)	8.3 (8-8.6)	11.3 (10.9-11.7)	0.404	1	0.525	0.049	0.525	1.15 (0.34-3.88)	0.815819
	37	4.7 (4.5-4.9)	4.6 (4.4-4.8)	4.8 (4.6-5)	0.004	1	>.999*	0.005	0.951	1.47 (0.21-10.04)	0.697113
	38	8.8 (8.5-9.1)	9.3 (9-9.6)	8.1 (7.8-8.4)	0.07	1	>.999*	-0.02	0.792	1.34 (0.28-6.51)	0.717402
	39	9.4 (9.1-9.7)	8.3 (8-8.6)	11.3 (10.9-11.7)	0.404	1	0.525	0.049	0.525	1.75 (0.55-5.64)	0.346244
	40	11.2 (10.8-11.6)	7.4 (7.1-7.7)	17.7 (17.3-18.1)	4.238	1	0.040	0.158	0.040	2.88 (0.86-9.62)	0.0854302
	41	1.8 (1.6-2)	0.9 (0.8-1)	3.2 (3-3.4)	1.202	1	0.555*	0.084	0.273	4.41 (0.26-73.42)	0.301441
	42	2.9 (2.7-3.1)	0.9 (0.8-1)	6.5 (6.2-6.8)	4.213	1	0.060*	0.157	0.04	2.51 (0.10-61.98)	0.573191
	43	5.9 (5.6-6.2)	4.6 (4.4-4.8)	8.1 (7.8-8.4)	0.839	1	0.500*	0.070	0.360	2.33 (0.53-10.25)	0.262233
	44	7.6 (7.3-7.9)	3.7 (3.5-3.9)	14.5 (14.1-14.9)	6.52	1	0.016*	0.196	0.011	3.81 (0.86-16.83)	0.077766
	45	9.4 (9.1-9.7)	10.2 (9.9-10.5)	8.1 (7.8-8.4)	0.208	1	0.788*	-0.035	0.649	0.91 (0.27-3.06)	0.877967
	46	8.8 (8.5-9.1)	8.3 (8-8.6)	9.7 (9.4-10)	0.088	1	0.766	0.023	0.766	0.67 (0.16-2.78)	0.577177
	47	47.1 (46.5-47.7)	43.5 (42.9-44.1)	53.2 (52.6-53.8)	1.49	1	0.222	0.094	0.222	1.11 (0.53-2.31)	0.790951
	48	44.7 (44.1-45.3)	42.6 (42-43.2)	48.4 (47.8-49)	0.535	1	0.465	0.056	0.465	0.87 (0.42-1.81)	0.714141
	49	29.4 (28.9-29.9)	24.1 (23.6-24.6)	38.7 (38.1-39.3)	4.064	1	0.044	0.155	0.044	2.03 (0.91-4.52)	0.0826304
	50	25.3 (24.8-25.8)	21.3 (20.8-21.8)	32.3 (31.8-32.8)	2.505	1	0.114	0.121	0.114	1.49 (0.64-3.47)	0.353671
	51	44.1 (43.5-44.7)	42.6 (42-43.2)	46.8 (46.2-47.4)	0.279	1	0.597	0.041	0.597	1.28 (0.62-2.66)	0.504725
	52	41.8 (41.2-42.4)	38.9 (38.3-39.5)	46.8 (46.2-47.4)	1.007	1	0.316	0.077	0.316	1.47 (0.71-3.02)	0.297555
	53	18.8 (18.3-19.3)	16.7 (16.3-17.1)	22.6 (22.1-23.1)	0.902	1	0.342	0.073	0.342	1.21 (0.50-2.90)	0.677696
	54	20 (19.5-20.5)	16.7 (16.3-17.1)	25.8 (25.3-26.3)	2.056	1	0.152	0.110	0.152	1.44 (0.62-3.34)	0.393728
	55	51.8 (51.2-52.4)	50.9 (50.3-51.5)	53.2 (52.6-53.8)	0.083	1	0.773	0.022	0.773	0.93 (0.46-1.90)	0.851398
	56	51.2 (50.6-51.8)	50.9 (50.3-51.5)	51.6 (51-52.2)	0.007	1	0.931	0.007	0.931	0.95 (0.47-1.93)	0.897184
	57	11.2 (10.8-11.6)	7.4 (7.1-7.7)	17.7 (17.3-18.1)	4.238	1	0.040	0.158	0.040	2.14 (0.75-6.13)	0.155324
	58	11.2 (10.8-11.6)	8.3 (8-8.6)	16.1 (15.7-16.5)	2.411	1	0.120	0.119	0.120	2.38 (0.80-7.03)	0.117
	59	25.3 (24.8-25.8)	17.6 (17.2-18)	38.7 (38.1-39.3)	9.295	1	0.002	0.234	0.002	3.59 (1.49-8.65)	0.00432565
	60	25.9 (25.4-26.4)	20.4 (19.9-20.9)	35.5 (34.9-36.1)	4.69	1	0.030	0.166	0.030	2.45 (1.06-5.63)	0.0350607
	61	33.5 (33-34)	26.9 (26.4-27.4)	45.2 (44.6-45.8)	5.925	1	0.015	0.187	0.015	2.23 (1.05-4.71)	0.0359989
	62	30.6 (30.1-31.1)	24.1 (23.6-24.6)	41.9 (41.3-42.5)	5.918	1	0.015	0.187	0.015	2.48 (1.14-5.42)	0.0226956
	63	42.4 (41.8-43)	37 (36.4-37.6)	51.6 (51-52.2)	3.427	1	0.064	0.142	0.064	2.25 (1.05-4.79)	0.0358949
	64	42.4 (41.8-43)	39.8 (39.2-40.4)	46.8 (46.2-47.4)	0.781	1	0.377	0.068	0.377	1.54 (0.74-3.23)	0.251055
	65	46.5 (45.9-47.1)	44.4 (43.8-45)	50 (49.4-50.6)	0.489	1	0.485	0.054	0.485	1.49 (0.72-3.10)	0.285534
	66	42.9 (42.3-43.5)	41.7 (41.1-42.3)	45.2 (44.6-45.8)	0.196	1	0.658	0.034	0.658	1.42 (0.67-3.01)	0.361117
	67	4.7 (4.5-4.9)	2.8 (2.6-3)	8.1 (7.8-8.4)	2.455	1	0.142*	0.12	0.117	4.05 (0.81-20.15)	0.0877701
	68	5.3 (5-5.6)	3.7 (3.5-3.9)	8.1 (7.8-8.4)	1.494	1	0.289*	0.094	0.222	4.07 (0.81-20.56)	0.0892317
	69	15.9 (15.5-16.3)	13.9 (13.5-14.3)	19.4 (18.9-19.9)	0.881	1	0.348	0.072	0.348	1.29 (0.48-3.45)	0.611508
	70	18.2 (17.8-18.6)	13.9 (13.5-14.3)	25.8 (25.3-26.3)	3.752	1	0.053	0.149	0.053	1.97 (0.81-4.80)	0.135191
	71	1.8 (1.6-2)	2.8 (2.6-3)	0 (0-0)	1.753	1	0.301*	-0.102	0.185	0.00 (0.00-0.00)	0.996648
	72	1.2 (1.1-1.3)	1.9 (1.7-2.1)	0 (0-0)	1.162	1	0.534*	-0.083	0.281	0.00 (0.00-0.00)	0.997082
	73	7.1 (6.8-7.4)	7.4 (7.1-7.7)	6.5 (6.2-6.8)	0.055	1	>.999*	-0.018	0.815	0.89 (0.19-4.18)	0.882229
	74	7.1 (6.8-7.4)	8.3 (8-8.6)	4.8 (4.6-5)	0.733	1	0.539	-0.066	0.392	0.78 (0.14-4.50)	0.782801
	75	5.9 (5.6-6.2)	6.5 (6.2-6.8)	4.8 (4.6-5)	0.192	1	0.748*	-0.034	0.661	1.62 (0.32-8.06)	0.557956
	76	2.9 (2.7-3.1)	4.6 (4.4-4.8)	0.0 (0.0-0.0)	2.957	1	0.16*	-0.132	0.085	0.00 (0.00-0.00)	0.997388
	77	6.5 (6.2-6.8)	7.4 (7.1-7.7)	4.8 (4.6-5)	0.429	1	0.748*	-0.050	0.512	1.13 (0.24-5.27)	0.87312
	78	6.5 (6.2-6.8)	8.3 (8-8.6)	3.2 (3-3.4)	1.698	1	0.331*	-0.100	0.193	0.58 (0.10-3.33)	0.540749
	79	10.6 (10.2-11)	9.3 (9-9.6)	12.9 (12.5-13.3)	0.552	1	0.451*	0.057	0.457	1.27 (0.41-3.96)	0.677095
	80	11.8 (11.4-12.2)	11.1 (10.7-11.5)	12.9 (12.5-13.3)	0.122	1	0.727	0.027	0.727	1.08 (0.35-3.36)	0.895784
	Legend: DF=degrees of freedom; * p-values not valid because of low cell frequency (<5 cases), intrepret phi-value; £ multivariate odds ratio ± 95% confidence interval based on logistic regression analysis correcting for age, disease duration, spinal mobility (BASMI), disease activity (BASDAI and PGDA), n=146, significant results in bold; p<.05
