# Supplementary material for: Widespread pain in axial spondyloarthritis: clinical importance and gender differences
Source: Arthritis Res Ther. 2018 Jul 27;20:156. doi: 10.1186/s13075-018-1626-8 (PMC6062924; doi:10.1186/s13075-018-1626-8)
Supplement: Supplementary file 3 — Table S3. Univariate Pearson product-moment correlations between all pain area estimates and clinical outcomes in patients with axial spondyloarthritis (n = 170). Correlation table for all pain area estimates and clinical outcomes. (XLSX 19 kb) [file 13075_2018_1626_MOESM3_ESM.xlsx]

## Sheet: eTable3 correlations gender
eTable 3. Univariate Pearson product-moment correlations between all pain area estimates and clinical outcomes in patients with axial spondyloarthritis (n=170)
		BASDAI	BASDAI inflammation	PGDA	CRP	Spinal pain locations	Articular pain locations	Non-articular pain locations	FACTOR 1 peripheral	FACTOR 2 axial	BASFI	BASMI	Age	Disease Duration	BMI	TSK-11	HADS Anxiety	HADS Depression
Total group (n=170)
BASDAI (0-10)		-	.824**	.482**	.139	.350**	.330**	.283**	.914**	.895**	.705**	.211**	.102	-.032	.068	.394**	.241**	.334**
BASDAI inflammation (0-10)		.824**	-	.468**	.179*	.296**	.213**	.172*	.787**	.805**	.544**	.146	.025	.002	.072	.282**	.136	.261**
PGDA (0-10) n=146		.482**	.468**	-	.367**	.142	.287**	.080	.519**	.402**	.402**	.084	-.041	-.080	.005	.219**	.0360	.164*
CRP (0-) n=141		.139	.179*	.367**	-	-.051	.094	.205*	.181*	.081	.225**	.149	-.043	-.076	-.165*	.052	-.130	-.046
Axial pain locations (0-100%)		.350**	.296**	.142	-.051	-	.312**	.317**	.303**	.598**	.308**	.084	.041	-.083	-.038	.232**	.304**	.245**
Articular pain locations (0-100%)		.330**	.213**	.287**	.094	.312**	-	.492**	.526**	.283**	.265**	.092	.100	-.053	.152*	.255**	.089	.035
Non-articular pain locations (0-100%)		.283**	.172*	.080	.205*	.317**	.492**	-	.380**	.250**	.328**	.181*	.122	.016	.015	.194*	.097	.166*
FACTOR 2 peripheral (0-100%)		.914**	.787**	.519**	.181*	.303**	.526**	.380**	-	.710**	.639**	.159*	.094	-.043	.092	.407**	.156*	.235**
FACTOR 1 axial (0-100%)		.895**	.805**	.402**	.081	.598**	.283**	.250**	.710**	-	.646**	.219**	.085	-.033	.046	.342**	.316**	.382**
BASFI (0-10)		.705**	.544**	.402**	.225**	.308**	.265**	.328**	.639**	.646**	-	.613**	.347**	.187*	.149	.446**	.212**	.362**
BASMI (0-10)		.211**	.146	.084	.149	.084	.092	.181*	.159*	.219**	.613**	-	.580**	.460**	.153*	.176*	.098	.243**
Age (yrs)		.102	.025	-.041	-.043	.041	.100	.122	.094	.085	.347**	.580**	-	.596**	.152*	.134	.090	.252**
Disease Duration (yrs)		-.032	.002	-.080	-.076	-.083	-.053	.016	-.043	-.033	.187*	.460**	.596**	-	-.015	-.018	.108	.091
BMI (kg/m2)		.068	.072	.005	-.165*	-.038	.152*	.015	.092	.046	.149	.153*	.152*	-.015	-	.044	.035	.120
TSK-11 (11-44)		.394**	.282**	.219**	.052	.232**	.255**	.194*	.407**	.342**	.446**	.176*	.134	-.018	.044	-	.277**	.347**
HADS anxiety (0-21)		.241**	.136	.036	-.130	.304**	.089	.097	.156*	.316**	.212**	.098	.090	.108	.035	.277**	-	.553**
HADS depression (0-21)		.334**	.261**	.164*	-.046	.245**	.035	.166*	.235**	.382**	.362**	.243**	.252**	.091	.120	.347**	.553**	-
Men (n=108) versus women (n=62)
BASDAI (0-10)	♂	-	.863**	.560**	0.199414	.363**	.383**	.290**	.920**	.898**	.736**	.256**	0.096493	-0.0433987	0.0215645	.486**	.196*	.468**
	♀	-	.760**	.301*	0.0233393	.256*	0.188254	0.243167	.905**	.880**	.648**	.262*	0.171924	0.0433251	0.191319	0.214633	.271*	0.096985
BASDAI inflammation (0-10)	♂	.863**	-	.521**	0.197165	.350**	.255**	0.176445	.817**	.836**	.589**	0.125894	-0.0185465	-0.0487449	0.0326235	.409**	0.137099	.355**
	♀	.760**	-	.331*	0.138214	0.190168	0.116927	0.153909	.717**	.777**	.452**	.262*	0.130776	0.11773	0.157674	0.00453348	0.129169	0.0671805
PGDA (0-10) n=95	♂	.560**	.521**	-	.497**	0.154419	.378**	0.0786656	.625**	.434**	.487**	0.084573	-0.0444859	-0.0674402	-0.0533758	.337**	0.0949835	0.191003
PGDA (0-10) n=51	♀	.301*	.331*	-	0.0679496	0.120393	0.0759552	0.0835141	0.239157	.343*	0.206084	0.0983335	-0.0326203	-0.108347	0.139521	-0.0564476	-0.0807288	0.0972276
CRP (0-) n=90	♂	0.199414	0.197165	.497**	-	-0.108226	0.188518	0.15372	.279**	0.070346	.232*	0.0665007	-0.069952	-0.0846569	-0.191849	0.0776281	-0.149466	-0.0476985
CRP (0-) n=51	♀	0.0233393	0.138214	0.0679496	-	0.0835515	-0.101068	.354*	-0.0561673	0.131077	0.215525	.378**	0.00312545	-0.069772	-0.119088	0.00395751	-0.0903157	-0.0458866
Axial pain locations (0-100%)	♂	.363**	.350**	0.154419	-0.108226	-	.284**	.301**	.316**	.605**	.319**	0.0993202	0.0274481	-0.100275	0.0568477	.282**	.370**	.369**
	♀	.256*	0.190168	0.120393	0.0835515	-	.329**	.333**	0.240878	.533**	.277*	0.244585	0.130866	0.00546085	-0.166659	0.147044	0.151853	0.0603097
Articular pain locations (0-100%)	♂	.383**	.255**	.378**	0.188518	.284**	-	.504**	.565**	.305**	.363**	0.165195	0.148474	-0.0637499	0.171164	.308**	0.0108087	0.0983671
	♀	0.188254	0.116927	0.0759552	-0.101068	.329**	-	.455**	.424**	0.192928	0.0637867	-0.0298335	0.0333792	-0.00201453	0.138139	0.147697	0.185126	-0.0789558
Non-articular pain locations (0-100%)	♂	.290**	0.176445	0.0786656	0.15372	.301**	.504**	-	.369**	.257**	.318**	0.167462	0.12363	-0.0405423	0.0435997	0.156499	0.0204339	.242*
	♀	0.243167	0.153909	0.0835141	.354*	.333**	.455**	-	.393**	0.200833	.344**	.328**	0.144894	0.164601	-0.0318131	.280*	0.218845	0.00608734
FACTOR 2 peripheral (0-100%)	♂	.920**	.817**	.625**	.279**	.316**	.565**	.369**	-	.716**	.654**	0.165267	0.0730475	-0.0967549	0.039236	.496**	0.091693	.354**
	♀	.905**	.717**	0.239157	-0.0561673	0.240878	.424**	.393**	-	.692**	.605**	.254*	0.175622	0.104472	0.223207	0.209517	0.245842	-0.0119416
FACTOR 1 axial (0-100%)	♂	.898**	.836**	.434**	0.070346	.605**	.305**	.257**	.716**	-	.696**	.282**	0.0863976	-0.0162748	0.0487688	.434**	.316**	.514**
	♀	.880**	.777**	.343*	0.131077	.533**	0.192928	0.200833	.692**	-	.559**	.270*	0.157288	0.00260952	0.086203	0.168546	.262*	0.166059
BASFI (0-10)	♂	.736**	.589**	.487**	.232*	.319**	.363**	.318**	.654**	.696**	-	.648**	.369**	.191*	0.129069	.502**	.220*	.509**
	♀	.648**	.452**	0.206084	0.215525	.277*	0.0637867	.344**	.605**	.559**	-	.667**	.327**	0.202193	0.196995	.336**	0.187008	0.0907215
BASMI (0-10)	♂	.256**	0.125894	0.084573	0.0665007	0.0993202	0.165195	0.167462	0.165267	.282**	.648**	-	.626**	.498**	.196*	.191*	0.154152	.310**
	♀	.262*	.262*	0.0983335	.378**	0.244585	-0.0298335	.328**	.254*	.270*	.667**	-	.451**	.345**	0.00588131	0.167826	0.0940671	0.0421715
Age (yrs)	♂	0.096493	-0.0185465	-0.0444859	-0.069952	0.0274481	0.148474	0.12363	0.0730475	0.0863976	.369**	.626**	-	.625**	0.144352	0.0715406	0.029871	.195*
	♀	0.171924	0.130776	-0.0326203	0.00312545	0.130866	0.0333792	0.144894	0.175622	0.157288	.327**	.451**	-	.527**	0.150782	.269*	0.233524	.360**
Disease Duration (yrs)	♂	-0.0433987	-0.0487449	-0.0674402	-0.0846569	-0.100275	-0.0637499	-0.0405423	-0.0967549	-0.0162748	.191*	.498**	.625**	-	0.0160351	-0.0696966	0.0848687	0.0846533
	♀	0.0433251	0.11773	-0.108347	-0.069772	0.00546085	-0.00201453	0.164601	0.104472	0.00260952	0.202193	.345**	.527**	-	-0.0904694	0.085884	0.190936	0.090455
BMI (kg/m2)	♂	0.0215645	0.0326235	-0.0533758	-0.191849	0.0568477	0.171164	0.0435997	0.039236	0.0487688	0.129069	.196*	0.144352	0.0160351	-	0.0402756	0.102774	0.165957
	♀	0.191319	0.157674	0.139521	-0.119088	-0.166659	0.138139	-0.0318131	0.223207	0.086203	0.196995	0.00588131	0.150782	-0.0904694	-	0.0537921	-0.0443431	0.0291875
TSK-11 (11-44)	♂	.486**	.409**	.337**	0.0776281	.282**	.308**	0.156499	.496**	.434**	.502**	.191*	0.0715406	-0.0696966	0.0402756	-	.242*	.378**
	♀	0.214633	0.00453348	-0.0564476	0.00395751	0.147044	0.147697	.280*	0.209517	0.168546	.336**	0.167826	.269*	0.085884	0.0537921	-	.344**	.288*
HADS anxiety (0-21)	♂	.196*	0.137099	0.0949835	-0.149466	.370**	0.0108087	0.0204339	0.091693	.316**	.220*	0.154152	0.029871	0.0848687	0.102774	.242*	-	.548**
	♀	.271*	0.129169	-0.0807288	-0.0903157	0.151853	0.185126	0.218845	0.245842	.262*	0.187008	0.0940671	0.233524	0.190936	-0.0443431	.344**	-	.601**
HADS depression (0-21)	♂	.468**	.355**	0.191003	-0.0476985	.369**	0.0983671	.242*	.354**	.514**	.509**	.310**	.195*	0.0846533	0.165957	.378**	.548**	-
	♀	0.096985	0.0671805	0.0972276	-0.0458866	0.0603097	-0.0789558	0.00608734	-0.0119416	0.166059	0.0907215	0.0421715	.360**	0.090455	0.0291875	.288*	.601**	-
CRP, C-reactive protein; BMI, Body Mass Index; PGDA, physician global disease activity; BASDAI, Bath Ankylosing Spondylitis Disease Activity Index; BASDAI inflammation: mean of item 5 and 6 of BASDAI; BASFI, Bath Ankylosing Spondylitis Functional Index; BASMI, Bath Ankylosing Spondylitis Disease Metrology Index; HADS, Hospital anxiety and depression scale; TSK-11, 11-item version of Tampa Scale f…
