# Supplementary material for: Widespread pain in axial spondyloarthritis: clinical importance and gender differences
Source: Arthritis Res Ther. 2018 Jul 27;20:156. doi: 10.1186/s13075-018-1626-8 (PMC6062924; doi:10.1186/s13075-018-1626-8)
Supplement: Supplementary file 4 — Table S4. General linear model results comparing clinical outcomes between subgroups based on WNAP and PGDA status across and within genders in patients with axial spondyloarthritis (n = 146). Full subgroup comparison data across and within genders. (XLSX 15 kb) [file 13075_2018_1626_MOESM4_ESM.xlsx]

## Sheet: eTable4 general linear model
		eTable 4. General linear model results comparing clinical outcomes between subgroups based on WNAP and PGDA status across and within genders in patients with axial spondyloarthritis (n=146)
		Outcome		Descriptive statistics (Mean ± SD)												Uncorrected (Uncorr) and Bonferroni ** corrected (Corr) p-values for all comparisons
				Group I WNAP- PGDA- n=59 ♂:43 ♀:16			Group II WNAP+ PGDA - n=40 ♂:25 ♀:15			Group III WNAP- PGDA+ n=24 ♂:15 ♀:9			Group IV WNAP+ PGDA+ n=23 ♂:12 ♀:11			Group I - II		Group I - III		Group I - IV		Group II - III		Group II - IV		Group III - IV		Between genders I		Between genders II		Between genders III		Between genders IV
																UnCorr	Corr	UnCorr	Corr	UnCorr	Corr	UnCorr	Corr	UnCorr	Corr	UnCorr	Corr	UnCorr	Corr	UnCorr	Corr	UnCorr	Corr	UnCorr	Corr
		BASFI	♂	2.1 ± 1.6			3.8 ± 2.2			4.9 ± 2.1			5.8 ± 2.6			0.002	0.039	<0.001	<0.001	<0.001	<0.001	0.084	1.000	0.007	0.148	0.307	1.000	NA	NA	NA	NA	NA	NA	NA	NA
			♀	2.7 ± 2.2			4.1 ± 2.5			2.7 ± 1.9			4.9 ± 2.0			0.070	1.000	0.969	1.000	0.010	0.217	0.113	1.000	0.355	1.000	0.022	0.485	NA	NA	NA	NA	NA	NA	NA	NA
			all	2.3 ± 1.8			3.9 ± 2.3			4.1 ± 2.3			5.3 ± 2.3			0.006	0.140	0.002	0.047	<0.001	<0.001	0.167	1.000	0.006	0.130	0.067	1.000	0.285	1.000	0.604	1.000	0.012	0.267	.307	1.000
		BASDAI	♂	2.2 ± 1.7			3.7 ± 1.6			5.4 ± 1.9			5.5 ± 2.5			0.002	0.047	<0.001	<0.001	<0.001	<0.001	0.009	0.205	0.008	0.176	0.829	1.000	NA	NA	NA	NA	NA	NA	NA	NA
			♀	3.4 ± 2.1			4.3 ± 2.1			4.2 ± 1.8			5.2 ± 1.7			0.160	1.000	0.304	1.000	0.016	0.342	0.854	1.000	0.257	1.000	0.241	1.000	NA	NA	NA	NA	NA	NA	NA	NA
			all	2.3 ± 1.8			3.9 ± 2.3			4.1 ± 2.3			5.3 ± 2.3			0.004	0.082	<0.001	0.002	<0.001	<0.001	0.144	1.000	0.009	0.206	0.167	1.000	0.042	0.929	0.327	1.000	0.145	1.000	0.681	1.000
		BASMI	♂	2.8 ± 1.7			3.6 ± 2.1			3.3 ± 2.0			3.9 ± 1.9			0.090	1.000	0.366	1.000	0.052	1.000	0.630	1.000	0.55	1.000	0.344	1.000	NA	NA	NA	NA	NA	NA	NA	NA
			♀	2.3 ± 0.7			2.9 ± 1.3			2.0 ± 1.1			2.9 ± 1.5			0.323	1.000	0.724	1.000	0.309	1.000	0.234	1.000	0.913	1.000	0.225	1.000	NA	NA	NA	NA	NA	NA	NA	NA
			all	2.7 ± 1.5			3.3 ± 1.9			2.8 ± 1.8			3.4 ± 1.8			0.167	1.000	0.167	1.000	0.097	1.000	0.167	1.000	0.167	1.000	0.167	1.000	0.242	1.000	0.204	1.000	0.072	1.000	0.164	1.000
		TSK-11	♂	22.8 ± 6.2			24.7 ± 6.4			28.1 ± 4.7			27.8 ± 6.8			0.209	1.000	0.003	0.077	0.012	0.272	0.081	1.000	0.149	1.000	0.87	1.000	NA	NA	NA	NA	NA	NA	NA	NA
			♀	22.0 ± 5.2			27.0 ± 5.6			24.2 ± 6.1			27.3 ± 6.9			0.023	0.498	0.380	1.000	0.026	0.577	0.276	1.000	0.897	1.000	0.256	1.000	NA	NA	NA	NA	NA	NA	NA	NA
			all	22.7 ± 5.9			25.6 ± 6.1			26.7 ± 5.5			27.5 ± 6.7			0.010	0.219	0.015	0.340	0.001	0.023	0.167	1.000	0.167	1.000	0.167	1.000	0.669	1.000	0.240	1.000	0.126	1.000	0.861	1.000
		HADS-A	♂	5.5 ± 3.3			7.5 ± 3.4			8.6 ± 3.7			7.3 ± 3.3			0.024	0.538	0.004	0.086	0.132	1.000	0.348	1.000	0.827	1.000	0.323	1.000	NA	NA	NA	NA	NA	NA	NA	NA
			♀	6.0 ± 3.2			9.9 ± 5.1			6.8 ± 2.2			7.9 ± 3.5			0.003	0.058	0.596	1.000	0.167	1.000	0.039	0.853	0.162	1.000	0.475	1.000	NA	NA	NA	NA	NA	NA	NA	NA
			all	5.6 ± 3.2			8.4 ± 4.2			7.9 ± 3.3			7.6 ± 3.3			<0.001	0.005	0.034	0.741	0.044	0.957	0.167	1.000	0.167	1.000	0.167	1.000	0.636	1.000	0.043	0.937	0.220	1.000	0.654	1.000
		HADS-D	♂	3.0 ± 2.7			5.7 ± 3.6			7.1 ± 4.7			6.2 ± 4.0			0.002	0.041	<0.001	0.002	0.005	0.114	0.210	1.000	0.712	1.000	0.469	1.000	NA	NA	NA	NA	NA	NA	NA	NA
			♀	4.1 ± 3.1			4.7 ± 3.3			3.0 ± 2.3			6.1 ± 4.4			0.626	1.000	0.460	1.000	0.134	1.000	0.252	1.000	0.299	1.000	0.048	1.000	NA	NA	NA	NA	NA	NA	NA	NA
			all	3.3 ± 2.8			5.3 ± 3.5			5.6 ± 4.4			6.1 ± 4.1			0.048	1.000	0.036	0.790	0.007	0.155	0.167	1.000	0.167	1.000	0.167	1.000	0.283	1.000	0.350	1.000	0.005	0.111	0.958	1.000
		WNAP, + yes/ - no widespread non-articular pain, for definition see main text; PGDA, + yes/ - no physician-reported global disease activity; BASFI, Bath Ankylosing Spondylitis Functional Index (0-10); BASDAI, Bath Ankylosing Spondylitis Disease Activity Index (0-10); BASMI, Bath Ankylosing Spondylitis Metrology Index (0-10), TSK-11, 11-item version Tampa Scale for Kinesiophobia (11-44); HADS-A/D,…
